# Supplementary material
Source: PubMed Central journal article supplement (PMC2789615)

Supplemental Figure S1

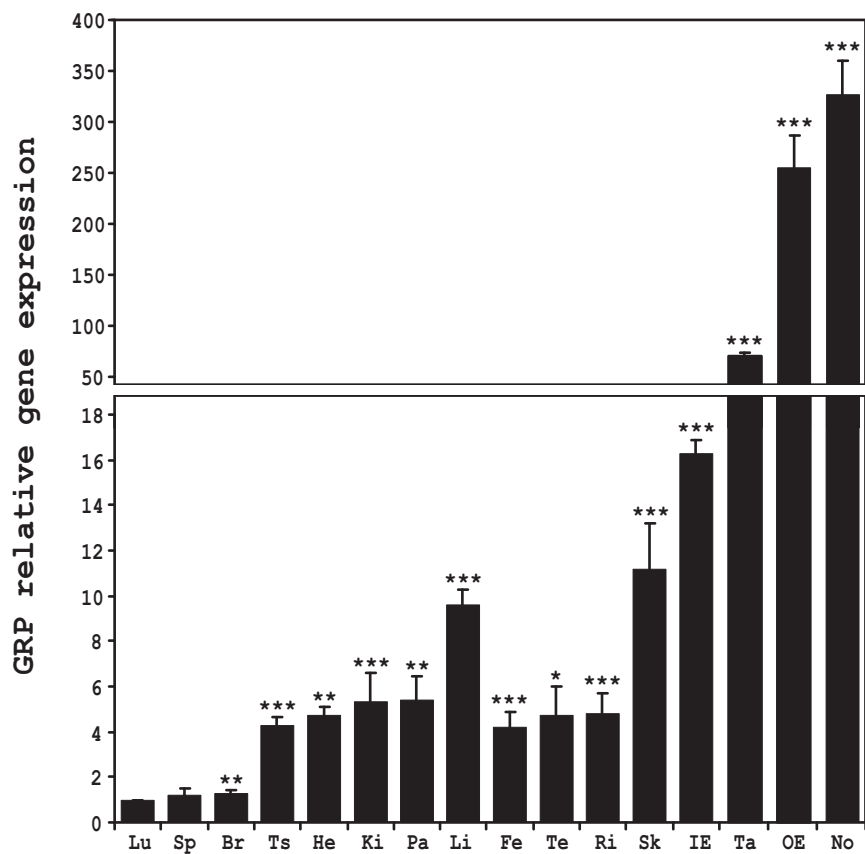

Supplement: ajpath.2009.090474_1.pdf [file ajpath.2009.090474_1.pdf]
